# Supplementary material
Source: PubMed Central journal article supplement (PMC4194188)

**Supplement Table 1.** The dynamics of BSEP transactivation before, during and after pregnancy

| Mouse Tag | Pre-mating        | Day -6 | Day -2           | Day -1 | Day 0  | Day +1 | Day +6 | Day +11 |
|-----------|-------------------|--------|------------------|--------|--------|--------|--------|---------|
| 5         | 48.1 <sup>a</sup> | 243    | 12.15            | 5.06   | 0.597  | 73.6   | 206    | 255     |
| 6         | 255               | 170    | 91.5             | 0.316  | 96.9   | 30.1   | 101    | 79.6    |
| 7         | 395               | 118    | 40.1             | 2.23   | 7.76   | 2.230  | 145    | 65.5    |
| 8         | 42.4              | 46.9   | N/A <sup>b</sup> | N/A    | 55.1   | 0.629  | 44.1   | 51.4    |
| 9         | 93.5              | 319    | 16.2             | 4.88   | 401    | 453    | 284    | 287     |
| 10        | 81.9              | 546    | 27.3             | 85.6   | 0.524  | 138    | 208    | 308     |
| 12        | 134               | 320    | 3.12             | 29.9   | 165    | 33.1   | 381    | 32.7    |
| 13        | 196               | 157    | 78.5             | 72.7   | 0.743  | 25.3   | 163    | 84.5    |
| 17        | 46.7              | 107    | 53.5             | 4.65   | 45     | 67.5   | N/A    | N/A     |
| 21        | 138               | 86.1   | 43.05            | 17     | 0.322  | 21.2   | 76.7   | N/A     |
| 25        | 1120              | 1090   | 54.5             | 212    | 0.423  | 998    | 1280   | 839     |
| 27        | 81                | 296    | 248              | 49.5   | 1.23   | 72.5   | 129    | 205     |
| 31        | 743               | 116    | 58               | 20.1   | 3.22   | 11.1   | 128    | 147     |
| 34        | 65                | 179    | 28.9             | 1.27   | 0.0245 | 139    | 133    | 58.5    |
| 40        | 94.3              | 402    | 146              | 0.27   | 92     | N/A    | 321    | 256     |

Notes: <sup>a</sup> total photon/second ( $\times 10^6$ ). <sup>b</sup> N/A data was not collected due to technical issues or mouse well-being.

**Supplement Table 2.** Serum E2 levels in mice before, during and after pregnancy

| Mouse Tag | Pre-mating       | Day -15 | Day -10          | Day -5 | Day -3 | Day -2 | Day -1 | Day 0 | Day +1 | Day +2 |
|-----------|------------------|---------|------------------|--------|--------|--------|--------|-------|--------|--------|
| 5         | 4.4 <sup>a</sup> | 7.0     | N/A <sup>b</sup> | 5.0    | 12.0   | 13.0   | N/A    | 16.0  | 16.0   | N/A    |
| 6         | 10.0             | 6.0     | 8.0              | 8.0    | 19.4   | 17.5   | 13.0   | 11.5  | 17.5   | 11.0   |
| 7         | 10.6             | 10.0    | 14.0             | 9.5    | 12.0   | 20.4   | 20.0   | 13.0  | 13.0   | 12.0   |
| 8         | 12.0             | 6.6     | 9.2              | 10.0   | 12.0   | 21.0   | 16.0   | 23.5  | 15.0   | 14.4   |
| 9         | 6.0              | 7.0     | 8.0              | 4.0    | 12.0   | 11.0   | 14.4   | 8.2   | 12.6   | 15.0   |
| 10        | 11.0             | 5.0     | 31.7             | 4.4    | 6.2    | 11.3   | 11.6   | 8.2   | 6.5    | 8.0    |
| 12        | 3.8              | 10.3    | 11.1             | 22.6   | 20.0   | 22.0   | 22.6   | 18.5  | 41.0   | 14.2   |
| 13        | 7.4              | 11.6    | N/A              | 16.8   | 26.3   | 24.0   | 19.2   | 6.8   | 8.0    | 7.0    |
| 21        | 13.0             | 10.3    | 13.6             | 12.5   | 16.8   | 24.0   | 6.4    | 33.0  | 12.0   | 8.6    |
| 25        | 1.2              | 15.6    | 2.0              | 38.0   | 41.3   | 33.0   | 43.0   | 28.9  | 10.4   | 10.0   |
| 27        | 12.0             | 7.5     | 17.5             | 14.0   | 11.6   | 14.0   | 13.5   | 11.0  | 8.0    | 17.0   |
| 31        | 14.0             | 6.0     | 25.0             | 6.0    | 10.3   | 10.0   | 46.0   | 12.2  | 9.6    | 9.0    |
| 34        | 13.6             | 1.8     | 15.2             | 17.3   | 15.0   | 49.0   | 12.2   | 41.0  | 8.4    | 10.4   |
| 40        | N/A              | 3.5     | 10.5             | 8.5    | 10.0   | 47.0   | 17.0   | 37.0  | 14.6   | 18.0   |

Notes: <sup>a</sup> serum E2 concentration (pg/ml). <sup>b</sup> N/A data was not collected due to technical issues or mouse well-being.

## Supplement Figure Legends

**Supplement Fig. 1. Effects of E2 on ER $\alpha$  expression in Huh 7 cells.** (A) Huh 7 cells were transfected with pcDNA5 vector or ER $\alpha$ , followed by treatment with E2 (10nM) or vehicle EtOH (0.1%) for 24h. ER $\alpha$  mRNA levels were quantified with real-time PCR. The mRNA levels from cells treated with EtOH were defined as 1. The Ct values were given on the top of the bars. (B) ER $\alpha$  protein levels were detected with Western blot. The protein levels from cells treated with EtOH were defined as 1. GAPDH was used as an internal standard to normalize mRNA and protein levels of ER $\alpha$ . \*  $p < 0.05$  in Student's t-test.

**Supplement Fig. 2. Hepatic expression of ER $\alpha$  in mice before, during and after pregnancy.** Liver tissues were collected from 5 non-pregnant mice, 5 pregnant mice at gestation day 18 and 5 mice 7 days post-delivery. (A) ER $\alpha$  mRNA levels were quantified with real-time PCR. The mRNA level from non-pregnant mice was defined as 1. The Ct values were given on the top of the bars. (B) ER $\alpha$  protein levels were detected with Western blot. GAPDH was used as an internal standard to normalize mRNA and protein levels of ER $\alpha$ . No statistic differences were detected with one-way ANOVA analysis.

**Supplement Fig. 3. Mutations in ligand and DNA binding domain abolished ER $\alpha$ 's functions in its classical transactivation pathway.** Huh 7 cells were transfected with pTK-2xERE and either ER $\alpha$ , ER $\alpha$ -LBD-Mut or ER $\alpha$ -DBD-Mut, followed by treatment with E2 (10nM) or vehicle EtOH (0.1%). Luciferase activities were detected by the dual luciferase assays. Data were presented as means  $\pm$  SD of at least three repeated experiments. \*  $p < 0.05$  in Student's t-test.

**Supplement Fig. 4. FXR and ER $\alpha$  proteins fused with eGFP fragment remained functional.** (A) Huh 7 cells were transfected with human BSEP promoter reporter phBSEP(-2.6kb), ER $\alpha$  and either FXR or eGFPn-FXR. (B) Huh 7 cells were transfected with phBSEP(-2.6kb), FXR and either ER $\alpha$  or ER $\alpha$ -eGFPc. The transfected cells were treated with CDCA (10 $\mu$ M), CDCA and E2 (10nM) or DMSO, followed by detection of luciferase activities by dual luciferase assay. Data were presented as means  $\pm$  SD of at least three repeated experiments. \*  $p < 0.05$  in Student's test.

**Supplement Fig. 5. The effects of pregnancy on hepatic expression of SHP in mice.** Liver tissues were collected from 5 non-pregnant mice, 5 pregnant mice at gestation day 18 and 5 mice 7 days post-delivery. (A) SHP mRNA levels were quantified with real-time PCR. The mRNA level from non-pregnant mice was defined as 1. (B) SHP protein levels were detected with Western blot. GAPDH was used as an internal standard to normalize mRNA and protein levels of SHP. One-way ANOVA was applied to analyze data, followed by Tukey post-hoc test for multiple comparisons. \*\*  $p < 0.01$ .

# Supplement Fig. 1

**A**

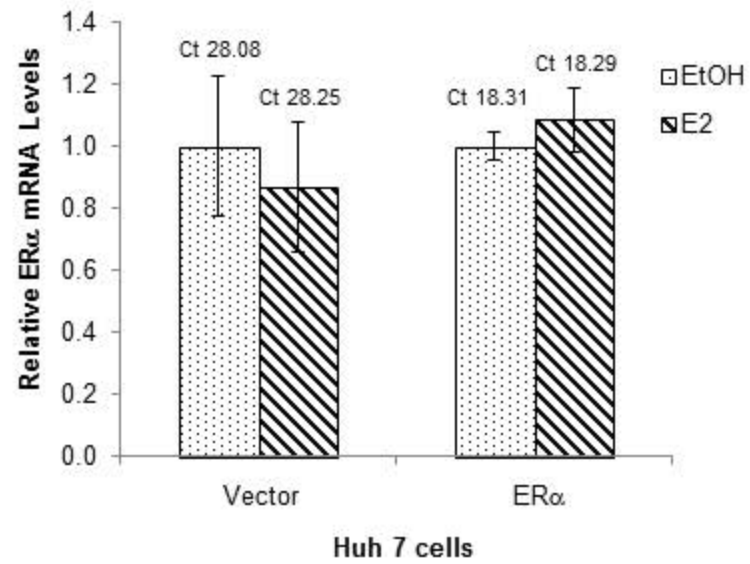

# Supplement Fig. 1

**B**

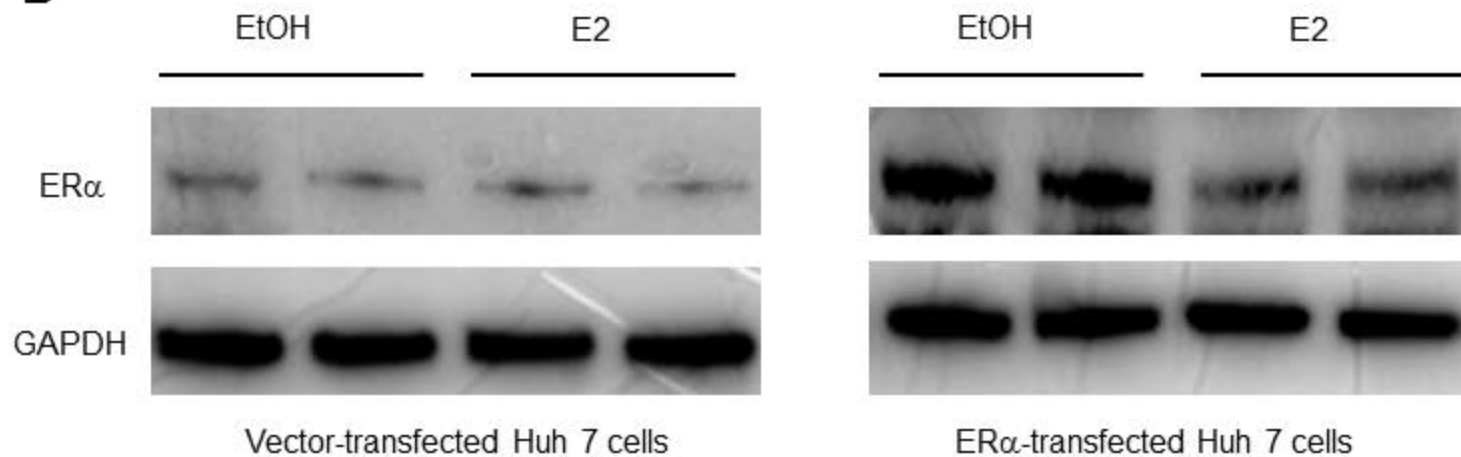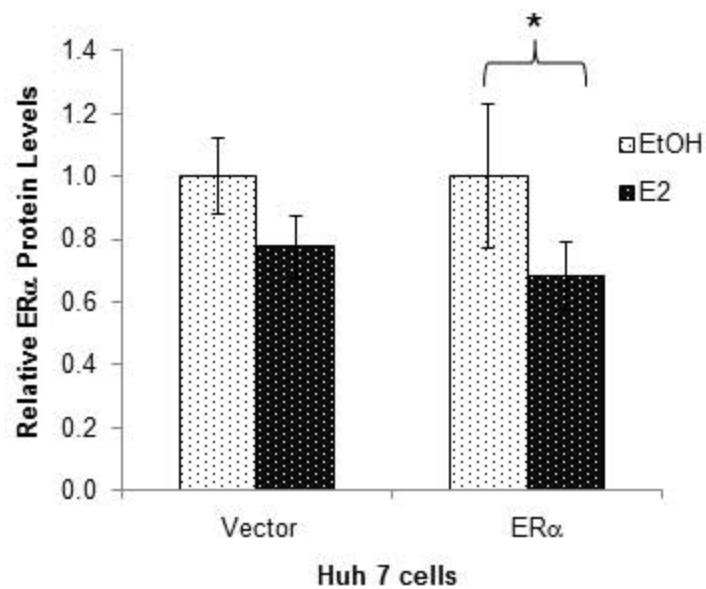

# Supplement Fig. 2

**A**

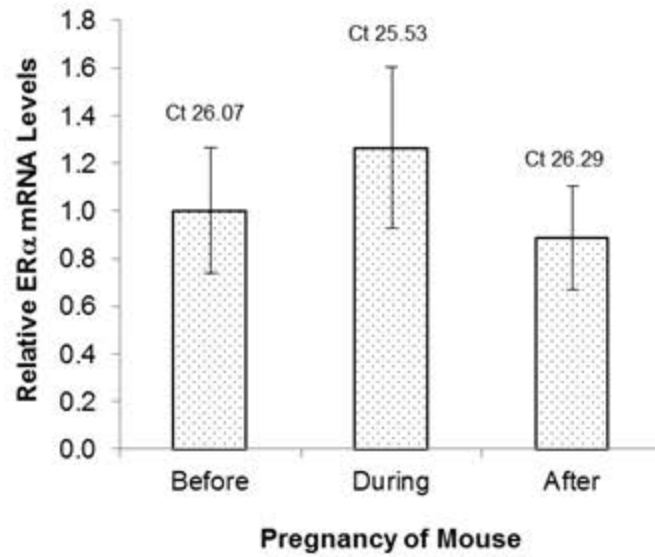

## Supplement Fig. 2

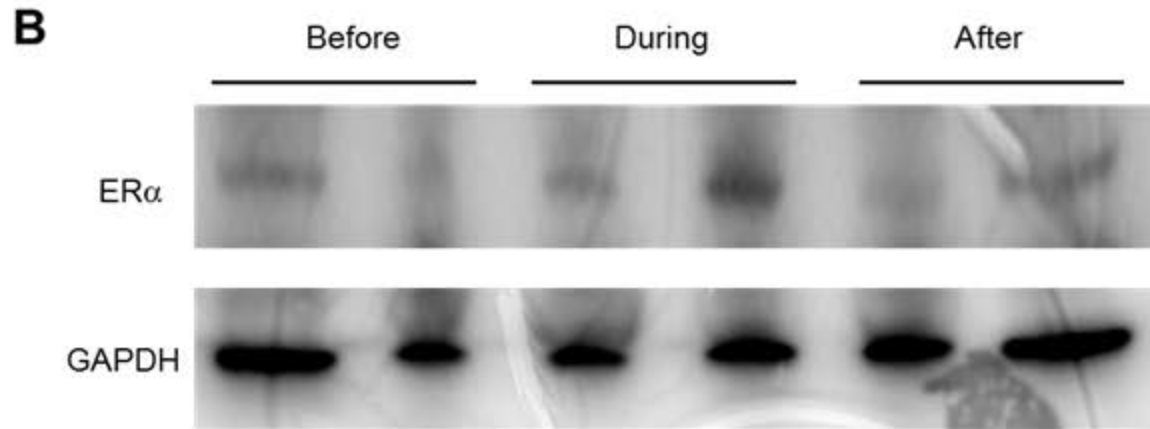

Mice before, during and after pregnancy

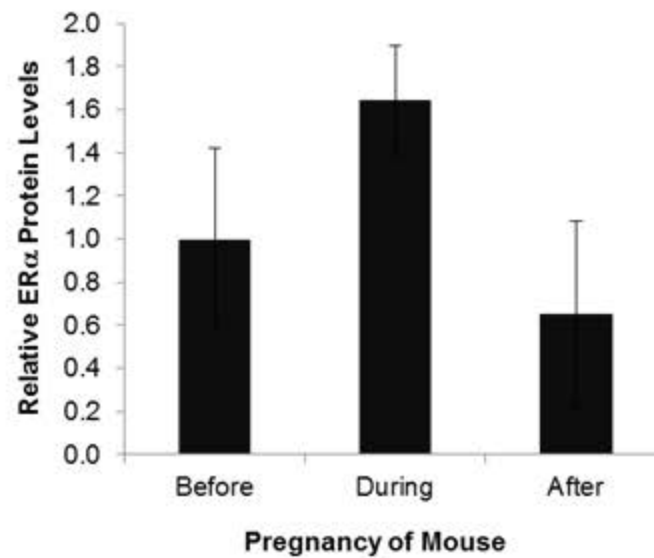

## Supplement Fig. 3

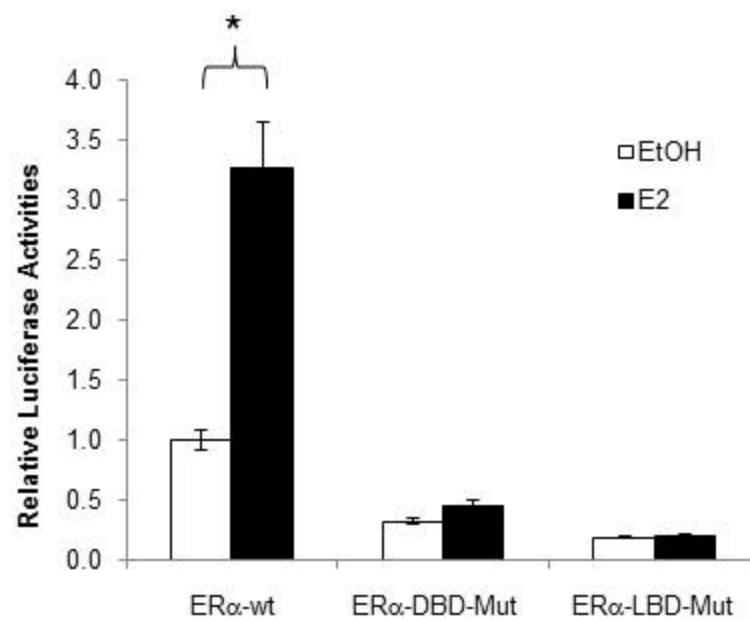

# Supplement Fig. 4

## A

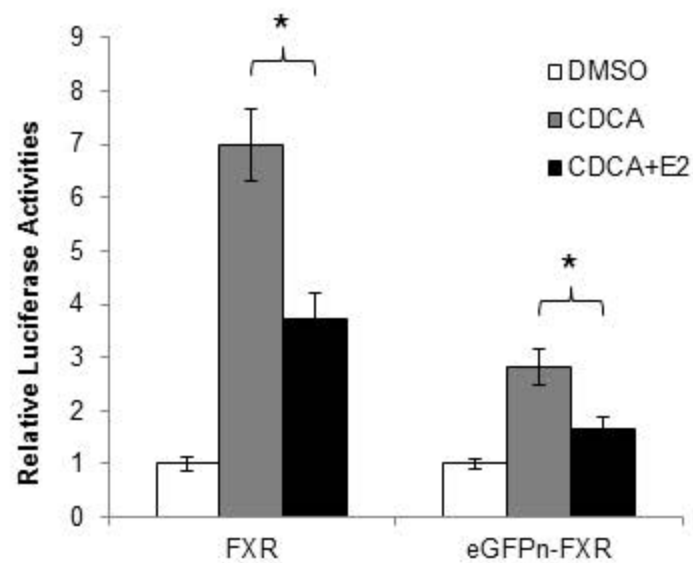

## B

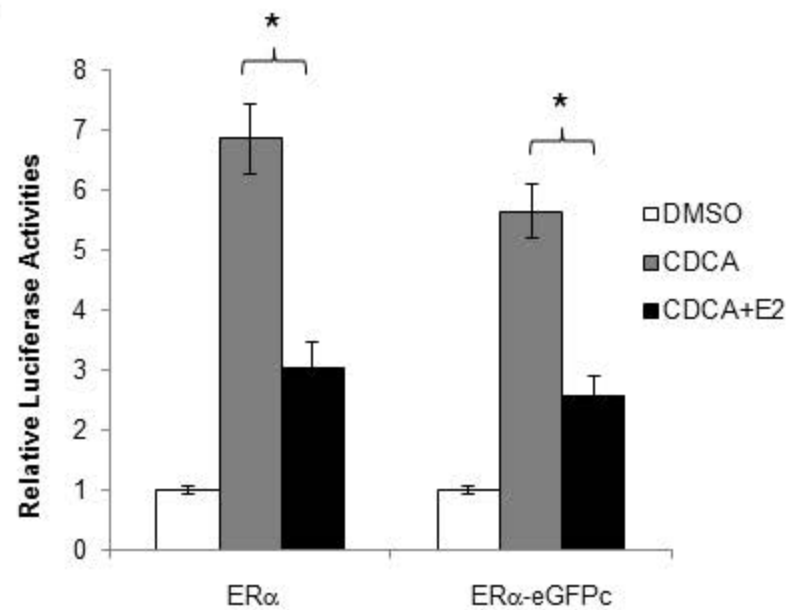



# Supplement Fig. 5

**A**

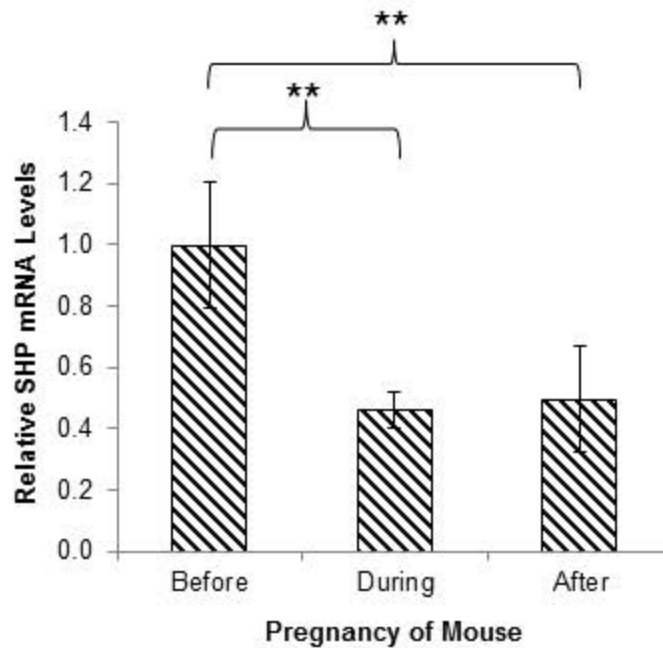

# Supplement Fig. 5

**B**

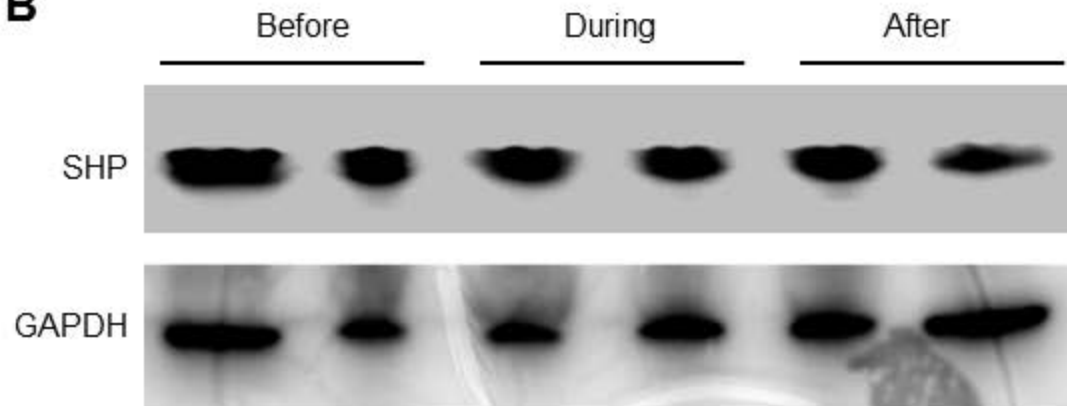

Mice before, during and after pregnancy

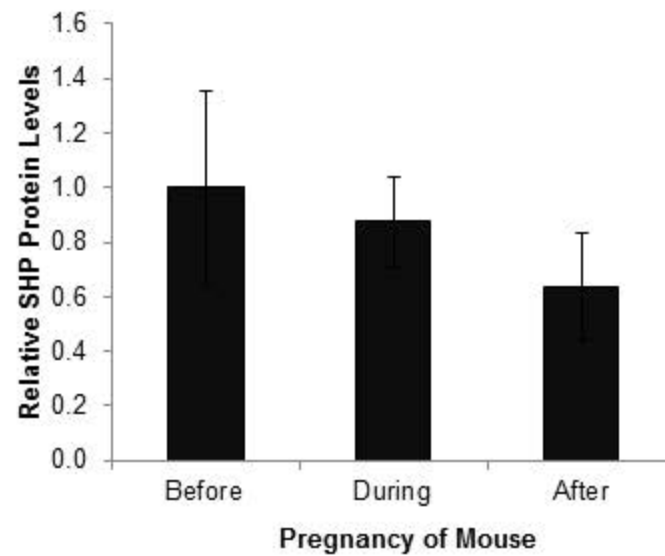

Supplement: NIHMS587092-supplement-Supp_FigureS1-S5___Table_S1-S2.pdf [file NIHMS587092-supplement-Supp_FigureS1-S5___Table_S1-S2.pdf]
